# Supplementary material
Source: publisher figshare collection journal article supplement (https://acs.figshare.com/ndownloader/files/4491361)
Supplement: Supplementary file 1 [file 4491361]

Structure for MIL-53(Fe)-H�:

data_MIL-53(Fe)dry-4H
_audit_creation_date              2009-10-30
_audit_creation_method            'Materials Studio'
_symmetry_space_group_name_H-M    'P1'
_symmetry_Int_Tables_number       1
_symmetry_cell_setting            triclinic
loop_
_symmetry_equiv_pos_as_xyz
  x,y,z
_cell_length_a                    21.2693
_cell_length_b                    6.7589
_cell_length_c                    6.8838
_cell_angle_alpha                 90.0000
_cell_angle_beta                  114.6250
_cell_angle_gamma                 90.0000
loop_
_atom_site_label
_atom_site_type_symbol
_atom_site_fract_x
_atom_site_fract_y
_atom_site_fract_z
_atom_site_U_iso_or_equiv
_atom_site_adp_type
_atom_site_occupancy
O1     O     0.44271   0.30190   0.32116   0.00000  Uiso   1.00
O2     O     0.41860   0.37576   0.97806   0.00000  Uiso   1.00
C3     C     0.32346   0.27325   0.05926   0.00000  Uiso   1.00
C4     C     0.29765   0.22605   0.21247   0.00000  Uiso   1.00
C5     C     0.22593   0.20372   0.15464   0.00000  Uiso   1.00
C6     C     0.39974   0.32057   0.12438   0.00000  Uiso   1.00
H7     H     0.33321   0.20978   0.37911   0.00000  Uiso   1.00
H8     H     0.20892   0.16593   0.27817   0.00000  Uiso   1.00
O9     O     0.94271   0.80190   0.32116   0.00000  Uiso   1.00
O10    O     0.91860   0.87576   0.97806   0.00000  Uiso   1.00
C11    C     0.82346   0.77325   0.05926   0.00000  Uiso   1.00
C12    C     0.79765   0.72605   0.21247   0.00000  Uiso   1.00
C13    C     0.72593   0.70372   0.15464   0.00000  Uiso   1.00
C14    C     0.89974   0.82057   0.12438   0.00000  Uiso   1.00
H15    H     0.83321   0.70978   0.37911   0.00000  Uiso   1.00
H16    H     0.70892   0.66593   0.27817   0.00000  Uiso   1.00
O17    O     0.55729   0.30190   0.17884   0.00000  Uiso   1.00
O18    O     0.58140   0.37576   0.52194   0.00000  Uiso   1.00
C19    C     0.67654   0.27325   0.44074   0.00000  Uiso   1.00
C20    C     0.70235   0.22605   0.28753   0.00000  Uiso   1.00
C21    C     0.77407   0.20372   0.34536   0.00000  Uiso   1.00
C22    C     0.60026   0.32057   0.37562   0.00000  Uiso   1.00
H23    H     0.66679   0.20978   0.12089   0.00000  Uiso   1.00
H24    H     0.79108   0.16593   0.22183   0.00000  Uiso   1.00
O25    O     0.05729   0.80190   0.17884   0.00000  Uiso   1.00
O26    O     0.08140   0.87576   0.52194   0.00000  Uiso   1.00
C27    C     0.17654   0.77325   0.44074   0.00000  Uiso   1.00
C28    C     0.20235   0.72605   0.28753   0.00000  Uiso   1.00
C29    C     0.27407   0.70372   0.34536   0.00000  Uiso   1.00
C30    C     0.10026   0.82057   0.37562   0.00000  Uiso   1.00
H31    H     0.16679   0.70978   0.12089   0.00000  Uiso   1.00
H32    H     0.29108   0.66593   0.22183   0.00000  Uiso   1.00
O33    O     0.55729   0.69810   0.67884   0.00000  Uiso   1.00
O34    O     0.58140   0.62424   0.02194   0.00000  Uiso   1.00
C35    C     0.67654   0.72675   0.94074   0.00000  Uiso   1.00
C36    C     0.70235   0.77395   0.78753   0.00000  Uiso   1.00
C37    C     0.77407   0.79628   0.84536   0.00000  Uiso   1.00
C38    C     0.60026   0.67943   0.87562   0.00000  Uiso   1.00
H39    H     0.66679   0.79022   0.62089   0.00000  Uiso   1.00
H40    H     0.79108   0.83407   0.72183   0.00000  Uiso   1.00
O41    O     0.05729   0.19810   0.67884   0.00000  Uiso   1.00
O42    O     0.08140   0.12424   0.02194   0.00000  Uiso   1.00
C43    C     0.17654   0.22675   0.94074   0.00000  Uiso   1.00
C44    C     0.20235   0.27395   0.78753   0.00000  Uiso   1.00
C45    C     0.27407   0.29628   0.84536   0.00000  Uiso   1.00
C46    C     0.10026   0.17943   0.87562   0.00000  Uiso   1.00
H47    H     0.16679   0.29022   0.62089   0.00000  Uiso   1.00
H48    H     0.29108   0.33407   0.72183   0.00000  Uiso   1.00
O49    O     0.44271   0.69810   0.82116   0.00000  Uiso   1.00
O50    O     0.41860   0.62424   0.47806   0.00000  Uiso   1.00
C51    C     0.32346   0.72675   0.55926   0.00000  Uiso   1.00
C52    C     0.29765   0.77395   0.71247   0.00000  Uiso   1.00
C53    C     0.22593   0.79628   0.65464   0.00000  Uiso   1.00
C54    C     0.39974   0.67943   0.62438   0.00000  Uiso   1.00
H55    H     0.33321   0.79022   0.87911   0.00000  Uiso   1.00
H56    H     0.20892   0.83407   0.77817   0.00000  Uiso   1.00
O57    O     0.94271   0.19810   0.82116   0.00000  Uiso   1.00
O58    O     0.91860   0.12424   0.47806   0.00000  Uiso   1.00
C59    C     0.82346   0.22675   0.55926   0.00000  Uiso   1.00
C60    C     0.79765   0.27395   0.71247   0.00000  Uiso   1.00
C61    C     0.72593   0.29628   0.65464   0.00000  Uiso   1.00
C62    C     0.89974   0.17943   0.62438   0.00000  Uiso   1.00
H63    H     0.83321   0.29022   0.87911   0.00000  Uiso   1.00
H64    H     0.70892   0.33407   0.77817   0.00000  Uiso   1.00
Fe65   Fe    0.00000   0.00000   0.00000   0.00000  Uiso   1.00
Fe66   Fe    0.50000   0.50000   0.00000   0.00000  Uiso   1.00
Fe67   Fe    0.00000   0.00000   0.50000   0.00000  Uiso   1.00
Fe68   Fe    0.50000   0.50000   0.50000   0.00000  Uiso   1.00
O69    O     0.00000   0.86369   0.75000   0.00000  Uiso   1.00
H70    H     0.00000   0.71860   0.75000   0.00000  Uiso   1.00
O71    O     0.50000   0.36369   0.75000   0.00000  Uiso   1.00
H72    H     0.50000   0.21860   0.75000   0.00000  Uiso   1.00
O73    O     0.00000   0.13631   0.25000   0.00000  Uiso   1.00
H74    H     0.00000   0.28140   0.25000   0.00000  Uiso   1.00
O75    O     0.50000   0.63631   0.25000   0.00000  Uiso   1.00
H76    H     0.50000   0.78140   0.25000   0.00000  Uiso   1.00
loop_
_geom_bond_atom_site_label_1
_geom_bond_atom_site_label_2
_geom_bond_distance
_geom_bond_site_symmetry_2
_ccdc_geom_bond_type
O1     C6      1.286   .     A
O1     Fe68    1.882   .     A
O2     C6      1.285   1_556 A
O2     Fe66    1.873   1_556 A
C3     C6      1.526   .     S
C3     C4      1.413   .     A
C3     C45     1.417   1_554 S
C4     C5      1.415   .     A
C4     H7      1.085   .     S
C5     H8      1.084   .     S
C5     C43     1.417   1_554 S
C6     O2      1.285   1_554 A
O9     C14     1.286   .     A
O9     Fe67    1.882   1_665 A
O10    C14     1.285   1_556 A
O10    Fe65    1.873   1_666 A
C11    C14     1.526   .     S
C11    C12     1.413   .     A
C11    C37     1.417   1_554 S
C12    C13     1.415   .     A
C12    H15     1.085   .     S
C13    H16     1.084   .     S
C13    C35     1.417   1_554 S
C14    O10     1.285   1_554 A
O17    C22     1.286   .     A
O17    Fe66    1.882   .     A
O18    C22     1.285   .     A
O18    Fe68    1.873   .     A
C19    C22     1.526   .     S
C19    C20     1.413   .     A
C19    C61     1.417   .     S
C20    C21     1.415   .     A
C20    H23     1.085   .     S
C21    H24     1.084   .     S
C21    C59     1.417   .     S
O25    C30     1.286   .     A
O25    Fe65    1.882   1_565 A
O26    C30     1.285   .     A
O26    Fe67    1.873   1_565 A
C27    C30     1.526   .     S
C27    C28     1.413   .     A
C27    C53     1.417   .     S
C28    C29     1.415   .     A
C28    H31     1.085   .     S
C29    H32     1.084   .     S
C29    C51     1.417   .     S
O33    C38     1.286   .     A
O33    Fe68    1.882   .     A
O34    C38     1.285   1_554 A
O34    Fe66    1.873   .     A
C35    C38     1.526   .     S
C35    C36     1.413   .     A
C35    C13     1.417   1_556 S
C36    C37     1.415   .     A
C36    H39     1.085   .     S
C37    H40     1.084   .     S
C37    C11     1.417   1_556 S
C38    O34     1.285   1_556 A
O41    C46     1.286   .     A
O41    Fe67    1.882   .     A
O42    C46     1.285   1_554 A
O42    Fe65    1.873   .     A
C43    C46     1.526   .     S
C43    C44     1.413   .     A
C43    C5      1.417   1_556 S
C44    C45     1.415   .     A
C44    H47     1.085   .     S
C45    H48     1.084   .     S
C45    C3      1.417   1_556 S
C46    O42     1.285   1_556 A
O49    C54     1.286   .     A
O49    Fe66    1.882   1_556 A
O50    C54     1.285   .     A
O50    Fe68    1.873   .     A
C51    C54     1.526   .     S
C51    C52     1.413   .     A
C52    C53     1.415   .     A
C52    H55     1.085   .     S
C53    H56     1.084   .     S
O57    C62     1.286   .     A
O57    Fe65    1.882   1_656 A
O58    C62     1.285   .     A
O58    Fe67    1.873   1_655 A
C59    C62     1.526   .     S
C59    C60     1.413   .     A
C60    C61     1.415   .     A
C60    H63     1.085   .     S
C61    H64     1.084   .     S
Fe65   O25     1.882   1_545 A
Fe65   O57     1.882   1_454 A
Fe65   O10     1.873   1_444 A
Fe65   O69     1.952   1_544 S
Fe65   O73     1.952   .     S
Fe66   O49     1.882   1_554 A
Fe66   O2      1.873   1_554 A
Fe66   O71     1.952   1_554 S
Fe66   O75     1.952   .     S
Fe67   O9      1.882   1_445 A
Fe67   O26     1.873   1_545 A
Fe67   O58     1.873   1_455 A
Fe67   O69     1.952   1_545 S
Fe67   O73     1.952   .     S
Fe68   O71     1.952   .     S
Fe68   O75     1.952   .     S
O69    H70     0.981   .     S
O69    Fe65    1.952   1_566 S
O69    Fe67    1.952   1_565 S
O71    H72     0.981   .     S
O71    Fe66    1.952   1_556 S
O73    H74     0.981   .     S
O75    H76     0.981   .     S

MIL-53(Fe)-COOH

data_MIL-53(Fe)dry-2COOH
_audit_creation_date              2009-10-30
_audit_creation_method            'Materials Studio'
_symmetry_space_group_name_H-M    'P1'
_symmetry_Int_Tables_number       1
_symmetry_cell_setting            triclinic
loop_
_symmetry_equiv_pos_as_xyz
  x,y,z
_cell_length_a                    20.0126
_cell_length_b                    8.0695
_cell_length_c                    6.9610
_cell_angle_alpha                 90.0000
_cell_angle_beta                  106.4007
_cell_angle_gamma                 90.0000
loop_
_atom_site_label
_atom_site_type_symbol
_atom_site_fract_x
_atom_site_fract_y
_atom_site_fract_z
_atom_site_U_iso_or_equiv
_atom_site_adp_type
_atom_site_occupancy
O1     O     0.94024   0.83854   0.05327   0.00000  Uiso   1.00
O2     O     0.91954   0.89110   0.35050   0.00000  Uiso   1.00
O3     O     0.89665   0.56316   0.85184   0.00000  Uiso   1.00
O4     O     0.83105   0.69541   0.58206   0.00000  Uiso   1.00
H5     H     0.87110   0.65995   0.52968   0.00000  Uiso   1.00
C6     C     0.89989   0.84114   0.16776   0.00000  Uiso   1.00
C7     C     0.82407   0.78472   0.08373   0.00000  Uiso   1.00
C8     C     0.77364   0.83473   0.17983   0.00000  Uiso   1.00
H9     H     0.79024   0.90447   0.31854   0.00000  Uiso   1.00
C10    C     0.79863   0.69902   0.89908   0.00000  Uiso   1.00
C11    C     0.84527   0.64711   0.77935   0.00000  Uiso   1.00
O12    O     0.44024   0.33854   0.05327   0.00000  Uiso   1.00
O13    O     0.41954   0.39110   0.35050   0.00000  Uiso   1.00
O14    O     0.39665   0.06316   0.85184   0.00000  Uiso   1.00
O15    O     0.33105   0.19541   0.58206   0.00000  Uiso   1.00
H16    H     0.37110   0.15995   0.52968   0.00000  Uiso   1.00
C17    C     0.39989   0.34114   0.16776   0.00000  Uiso   1.00
C18    C     0.32407   0.28472   0.08373   0.00000  Uiso   1.00
C19    C     0.27364   0.33473   0.17983   0.00000  Uiso   1.00
H20    H     0.29024   0.40447   0.31854   0.00000  Uiso   1.00
C21    C     0.29863   0.19902   0.89908   0.00000  Uiso   1.00
C22    C     0.34527   0.14711   0.77935   0.00000  Uiso   1.00
O23    O     0.05976   0.83854   0.44673   0.00000  Uiso   1.00
O24    O     0.08046   0.89110   0.14950   0.00000  Uiso   1.00
O25    O     0.10335   0.56316   0.64816   0.00000  Uiso   1.00
O26    O     0.16895   0.69541   0.91794   0.00000  Uiso   1.00
H27    H     0.12890   0.65995   0.97032   0.00000  Uiso   1.00
C28    C     0.10011   0.84114   0.33224   0.00000  Uiso   1.00
C29    C     0.17593   0.78472   0.41627   0.00000  Uiso   1.00
C30    C     0.22636   0.83473   0.32017   0.00000  Uiso   1.00
H31    H     0.20976   0.90447   0.18146   0.00000  Uiso   1.00
C32    C     0.20137   0.69902   0.60092   0.00000  Uiso   1.00
C33    C     0.15473   0.64711   0.72065   0.00000  Uiso   1.00
O34    O     0.55976   0.33854   0.44673   0.00000  Uiso   1.00
O35    O     0.58046   0.39110   0.14950   0.00000  Uiso   1.00
O36    O     0.60335   0.06316   0.64816   0.00000  Uiso   1.00
O37    O     0.66895   0.19541   0.91794   0.00000  Uiso   1.00
H38    H     0.62890   0.15995   0.97032   0.00000  Uiso   1.00
C39    C     0.60011   0.34114   0.33224   0.00000  Uiso   1.00
C40    C     0.67593   0.28472   0.41627   0.00000  Uiso   1.00
C41    C     0.72636   0.33473   0.32017   0.00000  Uiso   1.00
H42    H     0.70976   0.40447   0.18146   0.00000  Uiso   1.00
C43    C     0.70137   0.19902   0.60092   0.00000  Uiso   1.00
C44    C     0.65473   0.14711   0.72065   0.00000  Uiso   1.00
O45    O     0.05976   0.16146   0.94673   0.00000  Uiso   1.00
O46    O     0.08046   0.10890   0.64950   0.00000  Uiso   1.00
O47    O     0.10335   0.43684   0.14816   0.00000  Uiso   1.00
O48    O     0.16895   0.30459   0.41794   0.00000  Uiso   1.00
H49    H     0.12890   0.34005   0.47032   0.00000  Uiso   1.00
C50    C     0.10011   0.15886   0.83224   0.00000  Uiso   1.00
C51    C     0.17593   0.21528   0.91627   0.00000  Uiso   1.00
C52    C     0.22636   0.16527   0.82017   0.00000  Uiso   1.00
H53    H     0.20976   0.09553   0.68146   0.00000  Uiso   1.00
C54    C     0.20137   0.30098   0.10092   0.00000  Uiso   1.00
C55    C     0.15473   0.35289   0.22065   0.00000  Uiso   1.00
O56    O     0.55976   0.66146   0.94673   0.00000  Uiso   1.00
O57    O     0.58046   0.60890   0.64950   0.00000  Uiso   1.00
O58    O     0.60335   0.93684   0.14816   0.00000  Uiso   1.00
O59    O     0.66895   0.80459   0.41794   0.00000  Uiso   1.00
H60    H     0.62890   0.84005   0.47032   0.00000  Uiso   1.00
C61    C     0.60011   0.65886   0.83224   0.00000  Uiso   1.00
C62    C     0.67593   0.71528   0.91627   0.00000  Uiso   1.00
C63    C     0.72636   0.66527   0.82017   0.00000  Uiso   1.00
H64    H     0.70976   0.59553   0.68146   0.00000  Uiso   1.00
C65    C     0.70137   0.80098   0.10092   0.00000  Uiso   1.00
C66    C     0.65473   0.85289   0.22065   0.00000  Uiso   1.00
O67    O     0.94024   0.16146   0.55327   0.00000  Uiso   1.00
O68    O     0.91954   0.10890   0.85050   0.00000  Uiso   1.00
O69    O     0.89665   0.43684   0.35184   0.00000  Uiso   1.00
O70    O     0.83105   0.30459   0.08206   0.00000  Uiso   1.00
H71    H     0.87110   0.34005   0.02968   0.00000  Uiso   1.00
C72    C     0.89989   0.15886   0.66776   0.00000  Uiso   1.00
C73    C     0.82407   0.21528   0.58373   0.00000  Uiso   1.00
C74    C     0.77364   0.16527   0.67983   0.00000  Uiso   1.00
H75    H     0.79024   0.09553   0.81854   0.00000  Uiso   1.00
C76    C     0.79863   0.30098   0.39908   0.00000  Uiso   1.00
C77    C     0.84527   0.35289   0.27935   0.00000  Uiso   1.00
O78    O     0.44024   0.66146   0.55327   0.00000  Uiso   1.00
O79    O     0.41954   0.60890   0.85050   0.00000  Uiso   1.00
O80    O     0.39665   0.93684   0.35184   0.00000  Uiso   1.00
O81    O     0.33105   0.80459   0.08206   0.00000  Uiso   1.00
H82    H     0.37110   0.84005   0.02968   0.00000  Uiso   1.00
C83    C     0.39989   0.65886   0.66776   0.00000  Uiso   1.00
C84    C     0.32407   0.71528   0.58373   0.00000  Uiso   1.00
C85    C     0.27364   0.66527   0.67983   0.00000  Uiso   1.00
H86    H     0.29024   0.59553   0.81854   0.00000  Uiso   1.00
C87    C     0.29863   0.80098   0.39908   0.00000  Uiso   1.00
C88    C     0.34527   0.85289   0.27935   0.00000  Uiso   1.00
Fe89   Fe    0.00000   0.00000   0.00000   0.00000  Uiso   1.00
Fe90   Fe    0.50000   0.50000  -0.00000   0.00000  Uiso   1.00
Fe91   Fe    0.00000   0.00000   0.50000   0.00000  Uiso   1.00
Fe92   Fe    0.50000   0.50000   0.50000   0.00000  Uiso   1.00
O93    O     0.00000   0.11304   0.25000   0.00000  Uiso   1.00
H94    H     0.00000   0.23494   0.25000   0.00000  Uiso   1.00
O95    O     0.50000   0.61304   0.25000   0.00000  Uiso   1.00
H96    H     0.50000   0.73494   0.25000   0.00000  Uiso   1.00
O97    O     0.00000   0.88696   0.75000   0.00000  Uiso   1.00
H98    H     0.00000   0.76506   0.75000   0.00000  Uiso   1.00
O99    O     0.50000   0.38696   0.75000   0.00000  Uiso   1.00
H100   H     0.50000   0.26506   0.75000   0.00000  Uiso   1.00
loop_
_geom_bond_atom_site_label_1
_geom_bond_atom_site_label_2
_geom_bond_distance
_geom_bond_site_symmetry_2
_ccdc_geom_bond_type
O1     C6      1.285   .     S
O1     Fe89    1.875   1_665 S
O2     C6      1.286   .     S
O2     Fe91    1.871   1_665 S
O3     C11     1.216   .     S
O4     C11     1.378   .     S
O4     H5      1.011   .     S
C6     C7      1.533   .     S
C7     C8      1.418   .     S
C7     C10     1.421   1_554 S
C8     H9      1.085   .     S
C8     C65     1.421   .     S
C10    C7      1.421   1_556 S
C10    C11     1.477   .     S
C10    C63     1.421   .     S
O12    C17     1.285   .     S
O12    Fe90    1.875   .     S
O13    C17     1.286   .     S
O13    Fe92    1.871   .     S
O14    C22     1.216   .     S
O15    C22     1.378   .     S
O15    H16     1.011   .     S
C17    C18     1.533   .     S
C18    C19     1.418   .     S
C18    C21     1.421   1_554 S
C19    H20     1.085   .     S
C19    C54     1.421   .     S
C21    C18     1.421   1_556 S
C21    C22     1.477   .     S
C21    C52     1.421   .     S
O23    C28     1.285   .     S
O23    Fe91    1.875   1_565 S
O24    C28     1.286   .     S
O24    Fe89    1.871   1_565 S
O25    C33     1.216   .     S
O26    C33     1.378   .     S
O26    H27     1.011   .     S
C28    C29     1.533   .     S
C29    C30     1.418   .     S
C29    C32     1.421   .     S
C30    H31     1.085   .     S
C30    C87     1.421   .     S
C32    C33     1.477   .     S
C32    C85     1.421   .     S
O34    C39     1.285   .     S
O34    Fe92    1.875   .     S
O35    C39     1.286   .     S
O35    Fe90    1.871   .     S
O36    C44     1.216   .     S
O37    C44     1.378   .     S
O37    H38     1.011   .     S
C39    C40     1.533   .     S
C40    C41     1.418   .     S
C40    C43     1.421   .     S
C41    H42     1.085   .     S
C41    C76     1.421   .     S
C43    C44     1.477   .     S
C43    C74     1.421   .     S
O45    C50     1.285   .     S
O45    Fe89    1.875   1_556 S
O46    C50     1.286   .     S
O46    Fe91    1.871   .     S
O47    C55     1.216   .     S
O48    C55     1.378   .     S
O48    H49     1.011   .     S
C50    C51     1.533   .     S
C51    C52     1.418   .     S
C51    C54     1.421   1_556 S
C52    H53     1.085   .     S
C54    C51     1.421   1_554 S
C54    C55     1.477   .     S
O56    C61     1.285   .     S
O56    Fe90    1.875   1_556 S
O57    C61     1.286   .     S
O57    Fe92    1.871   .     S
O58    C66     1.216   .     S
O59    C66     1.378   .     S
O59    H60     1.011   .     S
C61    C62     1.533   .     S
C62    C63     1.418   .     S
C62    C65     1.421   1_556 S
C63    H64     1.085   .     S
C65    C62     1.421   1_554 S
C65    C66     1.477   .     S
O67    C72     1.285   .     S
O67    Fe91    1.875   1_655 S
O68    C72     1.286   .     S
O68    Fe89    1.871   1_656 S
O69    C77     1.216   .     S
O70    C77     1.378   .     S
O70    H71     1.011   .     S
C72    C73     1.533   .     S
C73    C74     1.418   .     S
C73    C76     1.421   .     S
C74    H75     1.085   .     S
C76    C77     1.477   .     S
O78    C83     1.285   .     S
O78    Fe92    1.875   .     S
O79    C83     1.286   .     S
O79    Fe90    1.871   1_556 S
O80    C88     1.216   .     S
O81    C88     1.378   .     S
O81    H82     1.011   .     S
C83    C84     1.533   .     S
C84    C85     1.418   .     S
C84    C87     1.421   .     S
C85    H86     1.085   .     S
C87    C88     1.477   .     S
Fe89   O1      1.875   1_445 S
Fe89   O45     1.875   1_554 S
Fe89   O93     1.965   .     S
Fe89   O97     1.965   1_544 S
Fe89   O24     1.871   1_545 S
Fe89   O68     1.871   1_454 S
Fe90   O56     1.875   1_554 S
Fe90   O95     1.965   .     S
Fe90   O99     1.965   1_554 S
Fe90   O79     1.871   1_554 S
Fe91   O23     1.875   1_545 S
Fe91   O67     1.875   1_455 S
Fe91   O93     1.965   .     S
Fe91   O97     1.965   1_545 S
Fe91   O2      1.871   1_445 S
Fe92   O95     1.965   .     S
Fe92   O99     1.965   .     S
O93    H94     0.984   .     S
O95    H96     0.984   .     S
O97    Fe89    1.965   1_566 S
O97    Fe91    1.965   1_565 S
O97    H98     0.984   .     S
O99    Fe90    1.965   1_556 S
O99    H100    0.984   .     S

MIL-53(Fe)-1NH2

data_MIL-53(Fe)dry-1NH2
_audit_creation_date              2009-10-30
_audit_creation_method            'Materials Studio'
_symmetry_space_group_name_H-M    'P1'
_symmetry_Int_Tables_number       1
_symmetry_cell_setting            triclinic
loop_
_symmetry_equiv_pos_as_xyz
  x,y,z
_cell_length_a                    20.1480
_cell_length_b                    7.9012
_cell_length_c                    6.9785
_cell_angle_alpha                 90.0000
_cell_angle_beta                  106.5200
_cell_angle_gamma                 90.0000
loop_
_atom_site_label
_atom_site_type_symbol
_atom_site_fract_x
_atom_site_fract_y
_atom_site_fract_z
_atom_site_U_iso_or_equiv
_atom_site_adp_type
_atom_site_occupancy
O1     O     0.41471   0.38644   0.35790   0.00000  Uiso   1.00
O2     O     0.43406   0.33795   1.05887   0.00000  Uiso   1.00
C3     C     0.31862   0.28165   0.08800   0.00000  Uiso   1.00
C4     C     0.26849   0.32515   0.18759   0.00000  Uiso   1.00
C5     C     0.19693   0.29267   0.10265   0.00000  Uiso   1.00
C6     C     0.39415   0.33914   0.17350   0.00000  Uiso   1.00
H7     H     0.28496   0.38761   0.33190   0.00000  Uiso   1.00
H8     H     0.16112   0.32636   0.18677   0.00000  Uiso   1.00
O9     O     0.91621   0.88153   0.34192   0.00000  Uiso   1.00
O10    O     0.93491   0.83552   1.04057   0.00000  Uiso   1.00
C11    C     0.82000   0.77098   0.07498   0.00000  Uiso   1.00
C12    C     0.77991   0.72502   0.20389   0.00000  Uiso   1.00
C13    C     0.70729   0.69802   0.13286   0.00000  Uiso   1.00
C14    C     0.89545   0.83338   0.15740   0.00000  Uiso   1.00
H15    H     0.80570   0.70688   0.36020   0.00000  Uiso   1.00
H16    H     0.67948   0.66040   0.23809   0.00000  Uiso   1.00
O17    O     0.57400   0.38972   0.16049   0.00000  Uiso   1.00
O18    O     0.55641   0.33961   0.46167   0.00000  Uiso   1.00
C19    C     0.67092   0.29005   0.42490   0.00000  Uiso   1.00
C20    C     0.70983   0.24506   0.29432   0.00000  Uiso   1.00
C21    C     0.78194   0.21369   0.36145   0.00000  Uiso   1.00
C22    C     0.59518   0.34250   0.34397   0.00000  Uiso   1.00
H23    H     0.68403   0.23588   0.13573   0.00000  Uiso   1.00
N24    N     0.81442   0.16603   0.21266   0.00000  Uiso   1.00
O25    O     0.07574   0.89305   0.14461   0.00000  Uiso   1.00
O26    O     0.05664   0.83774   0.44244   0.00000  Uiso   1.00
C27    C     0.17173   0.78907   0.41180   0.00000  Uiso   1.00
C28    C     0.22058   0.82489   0.30715   0.00000  Uiso   1.00
C29    C     0.29256   0.79755   0.39057   0.00000  Uiso   1.00
C30    C     0.09615   0.84249   0.32713   0.00000  Uiso   1.00
H31    H     0.20310   0.88190   0.16025   0.00000  Uiso   1.00
N32    N     0.33694   0.85183   0.27435   0.00000  Uiso   1.00
O33    O     0.57396   0.61769   0.65959   0.00000  Uiso   1.00
O34    O     0.55585   0.66652  -0.03898   0.00000  Uiso   1.00
C35    C     0.67111   0.71273   0.92754   0.00000  Uiso   1.00
C36    C     0.71114   0.75294   0.79833   0.00000  Uiso   1.00
C37    C     0.78339   0.77921   0.86825   0.00000  Uiso   1.00
C38    C     0.59513   0.66202   0.84450   0.00000  Uiso   1.00
H39    H     0.68655   0.75890   0.63888   0.00000  Uiso   1.00
N40    N     0.81867   0.80650   0.72213   0.00000  Uiso   1.00
O41    O     0.07510   0.11800   0.64163   0.00000  Uiso   1.00
O42    O     0.05562   0.17011  -0.05877   0.00000  Uiso   1.00
C43    C     0.17136   0.21820   0.91164   0.00000  Uiso   1.00
C44    C     0.22108   0.17487   0.81215   0.00000  Uiso   1.00
C45    C     0.29306   0.20149   0.89783   0.00000  Uiso   1.00
C46    C     0.09550   0.16547   0.82597   0.00000  Uiso   1.00
H47    H     0.20428   0.11158   0.66891   0.00000  Uiso   1.00
N48    N     0.33877   0.13694   0.79131   0.00000  Uiso   1.00
O49    O     0.41418   0.61639   0.85562   0.00000  Uiso   1.00
O50    O     0.43431   0.66594   0.55888   0.00000  Uiso   1.00
C51    C     0.31890   0.72483   0.58541   0.00000  Uiso   1.00
C52    C     0.26942   0.68918   0.69007   0.00000  Uiso   1.00
C53    C     0.19790   0.72192   0.60633   0.00000  Uiso   1.00
C54    C     0.39420   0.66616   0.67224   0.00000  Uiso   1.00
H55    H     0.28640   0.63307   0.83802   0.00000  Uiso   1.00
H56    H     0.16258   0.69522   0.69462   0.00000  Uiso   1.00
O57    O     0.91472   0.11575   0.83743   0.00000  Uiso   1.00
O58    O     0.93499   0.16602   0.54118   0.00000  Uiso   1.00
C59    C     0.81931   0.22609   0.56862   0.00000  Uiso   1.00
C60    C     0.78013   0.27660   0.69854   0.00000  Uiso   1.00
C61    C     0.70773   0.30588   0.62927   0.00000  Uiso   1.00
C62    C     0.89456   0.16488   0.65382   0.00000  Uiso   1.00
H63    H     0.80642   0.29441   0.85540   0.00000  Uiso   1.00
H64    H     0.68045   0.34544   0.73529   0.00000  Uiso   1.00
Fe65   Fe   -0.00471   0.00325  -0.00889   0.00000  Uiso   1.00
Fe66   Fe    0.49438   0.50282   0.00898   0.00000  Uiso   1.00
Fe67   Fe   -0.00436   0.00140   0.49159   0.00000  Uiso   1.00
Fe68   Fe    0.49461   0.50217   0.50934   0.00000  Uiso   1.00
O69    O    -0.00163   0.88334   0.74378   0.00000  Uiso   1.00
H70    H    -0.04530   0.82183   0.70579   0.00000  Uiso   1.00
O71    O     0.49555   0.38240   0.76013   0.00000  Uiso   1.00
H72    H     0.45004   0.32701   0.72211   0.00000  Uiso   1.00
O73    O    -0.00668   0.12190   0.23973   0.00000  Uiso   1.00
H74    H     0.03748   0.18337   0.27654   0.00000  Uiso   1.00
O75    O     0.49334   0.62255   0.25831   0.00000  Uiso   1.00
H76    H     0.53778   0.68267   0.29518   0.00000  Uiso   1.00
H77    H     0.78527   0.11014   0.07999   0.00000  Uiso   1.00
H78    H     0.86525   0.19978   0.22117   0.00000  Uiso   1.00
H79    H     0.31702   0.87870   0.12226   0.00000  Uiso   1.00
H80    H     0.38936   0.87842   0.33730   0.00000  Uiso   1.00
H81    H     0.79659   0.88330   0.59898   0.00000  Uiso   1.00
H82    H     0.85759   0.72138   0.71735   0.00000  Uiso   1.00
H83    H     0.32037   0.10608   0.63986   0.00000  Uiso   1.00
H84    H     0.38882   0.09676   0.86634   0.00000  Uiso   1.00
loop_
_geom_bond_atom_site_label_1
_geom_bond_atom_site_label_2
_geom_bond_distance
_geom_bond_site_symmetry_2
_ccdc_geom_bond_type
O1     C6      1.290   .     D
O1     Fe68    1.891   .     S
O2     C6      1.285   1_556 S
O2     Fe66    1.880   1_556 S
C3     C6      1.537   .     S
C3     C4      1.421   .     S
C3     C45     1.428   1_554 D
C4     C5      1.418   .     D
C4     H7      1.085   .     S
C5     H8      1.085   .     S
C5     C43     1.413   1_554 S
C6     O2      1.285   1_554 S
O9     C14     1.293   .     S
O9     Fe67    1.897   1_665 S
O10    C14     1.291   1_556 D
O10    Fe65    1.896   1_666 S
C11    C14     1.545   .     S
C11    C12     1.417   .     D
C11    C37     1.423   1_554 S
C12    C13     1.421   .     S
C12    H15     1.076   .     S
C13    H16     1.084   .     S
C13    C35     1.416   1_554 D
C14    O10     1.291   1_554 D
O17    C22     1.285   .     D
O17    Fe66    1.878   .     S
O18    C22     1.285   .     S
O18    Fe68    1.883   .     S
C19    C22     1.526   .     S
C19    C20     1.406   .     S
C19    C61     1.414   .     D
C20    C21     1.416   .     D
C20    H23     1.083   .     S
C21    N24     1.426   .     S
C21    C59     1.431   .     S
N24    H77     1.043   .     S
N24    H78     1.043   .     S
O25    C30     1.286   .     D
O25    Fe65    1.883   1_565 S
O26    C30     1.283   .     S
O26    Fe67    1.881   1_565 S
C27    C30     1.528   .     S
C27    C28     1.411   .     S
C27    C53     1.413   .     D
C28    C29     1.417   .     D
C28    H31     1.083   .     S
C29    N32     1.433   .     S
C29    C51     1.432   .     S
N32    H79     1.044   .     S
N32    H80     1.043   .     S
O33    C38     1.287   .     D
O33    Fe68    1.880   .     S
O34    Fe66    1.885   .     S
O34    C38     1.286   1_554 S
C35    C38     1.528   .     S
C35    C36     1.406   .     S
C35    C13     1.416   1_556 D
C36    C37     1.413   .     D
C36    H39     1.083   .     S
C37    N40     1.416   .     S
C37    C11     1.423   1_556 S
C38    O34     1.286   1_556 S
N40    H81     1.043   .     S
N40    H82     1.041   .     S
O41    C46     1.290   .     S
O41    Fe67    1.885   .     S
O42    Fe65    1.891   .     S
O42    C46     1.289   1_554 D
C43    C46     1.532   .     S
C43    C44     1.414   .     D
C43    C5      1.413   1_556 S
C44    C45     1.418   .     S
C44    H47     1.082   .     S
C45    N48     1.432   .     S
C45    C3      1.428   1_556 D
C46    O42     1.289   1_556 D
N48    H83     1.045   .     S
N48    H84     1.045   .     S
O49    C54     1.289   .     D
O49    Fe66    1.892   1_556 S
O50    C54     1.282   .     S
O50    Fe68    1.873   .     S
C51    C54     1.537   .     S
C51    C52     1.422   .     D
C52    C53     1.416   .     S
C52    H55     1.086   .     S
C53    H56     1.086   .     S
O57    C62     1.289   .     D
O57    Fe65    1.894   1_656 S
O58    C62     1.283   .     S
O58    Fe67    1.883   1_655 S
C59    C62     1.541   .     S
C59    C60     1.418   .     D
C60    C61     1.419   .     S
C60    H63     1.081   .     S
C61    H64     1.086   .     S
Fe65   O73     1.982   .     S
Fe65   O10     1.896   1_444 S
Fe65   O25     1.883   1_545 S
Fe65   O57     1.894   1_454 S
Fe65   O69     1.985   1_544 S
Fe66   O75     1.986   .     S
Fe66   O2      1.880   1_554 S
Fe66   O49     1.892   1_554 S
Fe66   O71     1.986   1_554 S
Fe67   O73     1.988   .     S
Fe67   O9      1.897   1_445 S
Fe67   O26     1.881   1_545 S
Fe67   O58     1.883   1_455 S
Fe67   O69     1.979   1_545 S
Fe68   O71     1.985   .     S
Fe68   O75     1.987   .     S
O69    H70     0.974   .     S
O69    Fe65    1.985   1_566 S
O69    Fe67    1.979   1_565 S
O71    H72     0.982   .     S
O71    Fe66    1.986   1_556 S
O73    H74     0.982   .     S
O75    H76     0.981   .     S


MIL-53(Fe)-Cl

data_MIL-53(Fe)dry-1Cl
_audit_creation_date              2009-10-30
_audit_creation_method            'Materials Studio'
_symmetry_space_group_name_H-M    'P1'
_symmetry_Int_Tables_number       1
_symmetry_cell_setting            triclinic
loop_
_symmetry_equiv_pos_as_xyz
  x,y,z
_cell_length_a                    20.1120
_cell_length_b                    7.4240
_cell_length_c                    6.8980
_cell_angle_alpha                 90.0000
_cell_angle_beta                  105.8900
_cell_angle_gamma                 90.0000
loop_
_atom_site_label
_atom_site_type_symbol
_atom_site_fract_x
_atom_site_fract_y
_atom_site_fract_z
_atom_site_U_iso_or_equiv
_atom_site_adp_type
_atom_site_occupancy
O1     O     0.42079   0.38601   0.35613   0.00000  Uiso   1.00
O2     O     0.44344   0.32031   1.06277   0.00000  Uiso   1.00
C3     C     0.32524   0.27745   0.08810   0.00000  Uiso   1.00
C4     C     0.27757   0.30615   0.20417   0.00000  Uiso   1.00
C5     C     0.20547   0.27644   0.12473   0.00000  Uiso   1.00
C6     C     0.40143   0.33010   0.17298   0.00000  Uiso   1.00
H7     H     0.29656   0.35267   0.35833   0.00000  Uiso   1.00
H8     H     0.17144   0.29665   0.22102   0.00000  Uiso   1.00
O9     O     0.92079   0.88601   0.35613   0.00000  Uiso   1.00
O10    O     0.94344   0.82031   1.06277   0.00000  Uiso   1.00
C11    C     0.82524   0.77745   0.08810   0.00000  Uiso   1.00
C12    C     0.77757   0.80615   0.20417   0.00000  Uiso   1.00
C13    C     0.70547   0.77644   0.12473   0.00000  Uiso   1.00
C14    C     0.90143   0.83010   0.17298   0.00000  Uiso   1.00
H15    H     0.79657   0.85267   0.35833   0.00000  Uiso   1.00
H16    H     0.67144   0.79665   0.22102   0.00000  Uiso   1.00
O17    O     0.58266   0.38555   0.15421   0.00000  Uiso   1.00
O18    O     0.56040   0.32133   0.44963   0.00000  Uiso   1.00
C19    C     0.67744   0.28156   0.42403   0.00000  Uiso   1.00
C20    C     0.72453   0.31007   0.30924   0.00000  Uiso   1.00
C21    C     0.79612   0.28246   0.38719   0.00000  Uiso   1.00
C22    C     0.60178   0.33262   0.33798   0.00000  Uiso   1.00
H23    H     0.70612   0.35727   0.15534   0.00000  Uiso   1.00
Cl24   Cl    0.84300   0.32147   0.21252   0.00000  Uiso   1.00
O25    O     0.08266   0.88555   0.15421   0.00000  Uiso   1.00
O26    O     0.06040   0.82133   0.44963   0.00000  Uiso   1.00
C27    C     0.17744   0.78156   0.42403   0.00000  Uiso   1.00
C28    C     0.22453   0.81007   0.30924   0.00000  Uiso   1.00
C29    C     0.29612   0.78246   0.38719   0.00000  Uiso   1.00
C30    C     0.10178   0.83262   0.33798   0.00000  Uiso   1.00
H31    H     0.20612   0.85727   0.15534   0.00000  Uiso   1.00
Cl32   Cl    0.34300   0.82147   0.21252   0.00000  Uiso   1.00
O33    O     0.58266   0.61445   0.65421   0.00000  Uiso   1.00
O34    O     0.56040   0.67867  -0.05037   0.00000  Uiso   1.00
C35    C     0.67744   0.71844   0.92403   0.00000  Uiso   1.00
C36    C     0.72453   0.68993   0.80924   0.00000  Uiso   1.00
C37    C     0.79612   0.71754   0.88719   0.00000  Uiso   1.00
C38    C     0.60178   0.66738   0.83798   0.00000  Uiso   1.00
H39    H     0.70612   0.64273   0.65534   0.00000  Uiso   1.00
Cl40   Cl    0.84300   0.67853   0.71252   0.00000  Uiso   1.00
O41    O     0.08266   0.11445   0.65421   0.00000  Uiso   1.00
O42    O     0.06040   0.17867  -0.05037   0.00000  Uiso   1.00
C43    C     0.17744   0.21844   0.92403   0.00000  Uiso   1.00
C44    C     0.22453   0.18993   0.80924   0.00000  Uiso   1.00
C45    C     0.29612   0.21754   0.88719   0.00000  Uiso   1.00
C46    C     0.10178   0.16738   0.83798   0.00000  Uiso   1.00
H47    H     0.20612   0.14273   0.65534   0.00000  Uiso   1.00
Cl48   Cl    0.34300   0.17853   0.71252   0.00000  Uiso   1.00
O49    O     0.42079   0.61399   0.85613   0.00000  Uiso   1.00
O50    O     0.44344   0.67969   0.56277   0.00000  Uiso   1.00
C51    C     0.32524   0.72255   0.58810   0.00000  Uiso   1.00
C52    C     0.27757   0.69385   0.70417   0.00000  Uiso   1.00
C53    C     0.20547   0.72356   0.62473   0.00000  Uiso   1.00
C54    C     0.40143   0.66990   0.67298   0.00000  Uiso   1.00
H55    H     0.29657   0.64733   0.85833   0.00000  Uiso   1.00
H56    H     0.17144   0.70335   0.72102   0.00000  Uiso   1.00
O57    O     0.92079   0.11399   0.85613   0.00000  Uiso   1.00
O58    O     0.94344   0.17969   0.56277   0.00000  Uiso   1.00
C59    C     0.82524   0.22255   0.58810   0.00000  Uiso   1.00
C60    C     0.77757   0.19384   0.70417   0.00000  Uiso   1.00
C61    C     0.70547   0.22356   0.62473   0.00000  Uiso   1.00
C62    C     0.90143   0.16990   0.67298   0.00000  Uiso   1.00
H63    H     0.79656   0.14733   0.85833   0.00000  Uiso   1.00
H64    H     0.67144   0.20335   0.72102   0.00000  Uiso   1.00
Fe65   Fe    0.00197  -0.00040   0.00554   0.00000  Uiso   1.00
Fe66   Fe    0.50197   0.49960   0.00554   0.00000  Uiso   1.00
Fe67   Fe    0.00197   0.00040   0.50554   0.00000  Uiso   1.00
Fe68   Fe    0.50197   0.50040   0.50554   0.00000  Uiso   1.00
O69    O     0.00346   0.87151   0.75618   0.00000  Uiso   1.00
H70    H    -0.03942   0.80169   0.71991   0.00000  Uiso   1.00
O71    O     0.50346   0.37151   0.75618   0.00000  Uiso   1.00
H72    H     0.46058   0.30169   0.71991   0.00000  Uiso   1.00
O73    O     0.00346   0.12849   0.25618   0.00000  Uiso   1.00
H74    H    -0.03942   0.19831   0.21991   0.00000  Uiso   1.00
O75    O     0.50346   0.62849   0.25618   0.00000  Uiso   1.00
H76    H     0.46058   0.69831   0.21991   0.00000  Uiso   1.00
loop_
_geom_bond_atom_site_label_1
_geom_bond_atom_site_label_2
_geom_bond_distance
_geom_bond_site_symmetry_2
_ccdc_geom_bond_type
O1     C6      1.285   .     A
O1     Fe68    1.878   .     S
O2     C6      1.284   1_556 A
O2     Fe66    1.889   1_556 S
C3     C6      1.534   .     S
C3     C4      1.423   .     A
C3     C45     1.420   1_554 S
C4     C5      1.420   .     A
C4     H7      1.083   .     S
C5     H8      1.087   .     S
C5     C43     1.412   1_554 A
C6     O2      1.284   1_554 A
O9     C14     1.285   .     A
O9     Fe67    1.878   1_665 S
O10    C14     1.284   1_556 S
O10    Fe65    1.889   1_666 A
C11    C14     1.534   .     S
C11    C12     1.423   .     A
C11    C37     1.420   1_554 S
C12    C13     1.420   .     A
C12    H15     1.083   .     S
C13    H16     1.087   .     S
C13    C35     1.412   1_554 A
C14    O10     1.284   1_554 S
O17    C22     1.282   .     A
O17    Fe66    1.868   .     S
O18    C22     1.282   .     A
O18    Fe68    1.883   .     S
C19    C22     1.522   .     S
C19    C20     1.407   .     A
C19    C61     1.412   .     A
C20    C21     1.407   .     A
C20    H23     1.082   .     S
C21    Cl24    1.745   .     S
C21    C59     1.420   .     A
O25    C30     1.282   .     A
O25    Fe65    1.868   1_565 S
O26    C30     1.282   .     A
O26    Fe67    1.883   1_565 S
C27    C30     1.522   .     S
C27    C28     1.407   .     A
C27    C53     1.412   .     A
C28    C29     1.407   .     A
C28    H31     1.082   .     S
C29    Cl32    1.745   .     S
C29    C51     1.420   .     A
O33    C38     1.282   .     A
O33    Fe68    1.868   .     S
O34    Fe66    1.883   .     S
O34    C38     1.282   1_554 A
C35    C38     1.522   .     S
C35    C36     1.407   .     A
C35    C13     1.412   1_556 A
C36    C37     1.407   .     A
C36    H39     1.082   .     S
C37    Cl40    1.745   .     S
C37    C11     1.420   1_556 S
C38    O34     1.282   1_556 A
O41    C46     1.282   .     A
O41    Fe67    1.868   .     S
O42    Fe65    1.883   .     S
O42    C46     1.282   1_554 S
C43    C46     1.522   .     S
C43    C44     1.407   .     A
C43    C5      1.412   1_556 A
C44    C45     1.407   .     A
C44    H47     1.082   .     S
C45    Cl48    1.745   .     S
C45    C3      1.420   1_556 S
C46    O42     1.282   1_556 S
O49    C54     1.285   .     A
O49    Fe66    1.878   1_556 S
O50    C54     1.284   .     A
O50    Fe68    1.889   .     S
C51    C54     1.534   .     S
C51    C52     1.423   .     A
C52    C53     1.420   .     A
C52    H55     1.083   .     S
C53    H56     1.087   .     S
O57    C62     1.285   .     A
O57    Fe65    1.878   1_656 S
O58    C62     1.284   .     A
O58    Fe67    1.889   1_655 A
C59    C62     1.534   .     S
C59    C60     1.423   .     A
C60    C61     1.420   .     A
C60    H63     1.083   .     S
C61    H64     1.087   .     S
Fe65   O73     1.969   .     S
Fe65   O10     1.889   1_444 A
Fe65   O25     1.868   1_545 S
Fe65   O57     1.878   1_454 S
Fe65   O69     1.973   1_544 A
Fe66   O75     1.969   .     S
Fe66   O2      1.889   1_554 S
Fe66   O49     1.878   1_554 S
Fe66   O71     1.973   1_554 S
Fe67   O73     1.973   .     S
Fe67   O9      1.878   1_445 S
Fe67   O26     1.883   1_545 S
Fe67   O58     1.889   1_455 A
Fe67   O69     1.969   1_545 S
Fe68   O71     1.969   .     S
Fe68   O75     1.973   .     S
O69    H70     0.978   .     S
O69    Fe65    1.973   1_566 A
O69    Fe67    1.969   1_565 S
O71    H72     0.978   .     S
O71    Fe66    1.973   1_556 S
O73    H74     0.978   .     S
O75    H76     0.978   .     S

MIL-53(Fe)-Br

data_MIL-53(Fe)dry-1Br
_audit_creation_date              2009-10-30
_audit_creation_method            'Materials Studio'
_symmetry_space_group_name_H-M    'P1'
_symmetry_Int_Tables_number       1
_symmetry_cell_setting            triclinic
loop_
_symmetry_equiv_pos_as_xyz
  x,y,z
_cell_length_a                    20.1638
_cell_length_b                    7.9958
_cell_length_c                    6.9138
_cell_angle_alpha                 90.0000
_cell_angle_beta                  106.9470
_cell_angle_gamma                 90.0000
loop_
_atom_site_label
_atom_site_type_symbol
_atom_site_fract_x
_atom_site_fract_y
_atom_site_fract_z
_atom_site_U_iso_or_equiv
_atom_site_adp_type
_atom_site_occupancy
O1     O     0.42155   0.38873   0.35341   0.00000  Uiso   1.00
O2     O     0.44078   0.33604   1.05423   0.00000  Uiso   1.00
C3     C     0.32512   0.28130   0.08695   0.00000  Uiso   1.00
C4     C     0.27784   0.31147   0.20100   0.00000  Uiso   1.00
C5     C     0.20583   0.27732   0.12332   0.00000  Uiso   1.00
C6     C     0.40109   0.33689   0.16962   0.00000  Uiso   1.00
H7     H     0.29705   0.36178   0.35273   0.00000  Uiso   1.00
H8     H     0.17229   0.29865   0.21858   0.00000  Uiso   1.00
O9     O     0.92155   0.88873   0.35341   0.00000  Uiso   1.00
O10    O     0.94078   0.83604   1.05423   0.00000  Uiso   1.00
C11    C     0.82512   0.78130   0.08695   0.00000  Uiso   1.00
C12    C     0.77784   0.81147   0.20100   0.00000  Uiso   1.00
C13    C     0.70583   0.77732   0.12332   0.00000  Uiso   1.00
C14    C     0.90109   0.83689   0.16962   0.00000  Uiso   1.00
H15    H     0.79705   0.86178   0.35273   0.00000  Uiso   1.00
H16    H     0.67229   0.79866   0.21858   0.00000  Uiso   1.00
O17    O     0.58134   0.38866   0.15840   0.00000  Uiso   1.00
O18    O     0.56249   0.33635   0.45927   0.00000  Uiso   1.00
C19    C     0.67727   0.28597   0.42590   0.00000  Uiso   1.00
C20    C     0.72393   0.31629   0.31296   0.00000  Uiso   1.00
C21    C     0.79560   0.28529   0.38972   0.00000  Uiso   1.00
C22    C     0.60181   0.34002   0.34300   0.00000  Uiso   1.00
H23    H     0.70513   0.36970   0.16289   0.00000  Uiso   1.00
Br24   Br    0.84621   0.34365   0.20656   0.00000  Uiso   1.00
O25    O     0.08134   0.88866   0.15840   0.00000  Uiso   1.00
O26    O     0.06249   0.83635   0.45927   0.00000  Uiso   1.00
C27    C     0.17727   0.78596   0.42590   0.00000  Uiso   1.00
C28    C     0.22393   0.81629   0.31296   0.00000  Uiso   1.00
C29    C     0.29560   0.78529   0.38972   0.00000  Uiso   1.00
C30    C     0.10181   0.84002   0.34300   0.00000  Uiso   1.00
H31    H     0.20513   0.86970   0.16289   0.00000  Uiso   1.00
Br32   Br    0.34621   0.84365   0.20656   0.00000  Uiso   1.00
O33    O     0.58134   0.61134   0.65840   0.00000  Uiso   1.00
O34    O     0.56249   0.66365  -0.04073   0.00000  Uiso   1.00
C35    C     0.67727   0.71403   0.92590   0.00000  Uiso   1.00
C36    C     0.72393   0.68371   0.81296   0.00000  Uiso   1.00
C37    C     0.79560   0.71471   0.88972   0.00000  Uiso   1.00
C38    C     0.60181   0.65998   0.84300   0.00000  Uiso   1.00
H39    H     0.70513   0.63030   0.66289   0.00000  Uiso   1.00
Br40   Br    0.84621   0.65635   0.70656   0.00000  Uiso   1.00
O41    O     0.08134   0.11134   0.65840   0.00000  Uiso   1.00
O42    O     0.06249   0.16365  -0.04073   0.00000  Uiso   1.00
C43    C     0.17727   0.21403   0.92590   0.00000  Uiso   1.00
C44    C     0.22393   0.18371   0.81296   0.00000  Uiso   1.00
C45    C     0.29560   0.21471   0.88972   0.00000  Uiso   1.00
C46    C     0.10181   0.15998   0.84300   0.00000  Uiso   1.00
H47    H     0.20513   0.13030   0.66289   0.00000  Uiso   1.00
Br48   Br    0.34621   0.15635   0.70656   0.00000  Uiso   1.00
O49    O     0.42155   0.61127   0.85341   0.00000  Uiso   1.00
O50    O     0.44078   0.66396   0.55423   0.00000  Uiso   1.00
C51    C     0.32512   0.71870   0.58695   0.00000  Uiso   1.00
C52    C     0.27784   0.68853   0.70100   0.00000  Uiso   1.00
C53    C     0.20583   0.72268   0.62332   0.00000  Uiso   1.00
C54    C     0.40109   0.66311   0.66962   0.00000  Uiso   1.00
H55    H     0.29705   0.63822   0.85273   0.00000  Uiso   1.00
H56    H     0.17229   0.70134   0.71858   0.00000  Uiso   1.00
O57    O     0.92155   0.11127   0.85341   0.00000  Uiso   1.00
O58    O     0.94078   0.16396   0.55423   0.00000  Uiso   1.00
C59    C     0.82512   0.21870   0.58695   0.00000  Uiso   1.00
C60    C     0.77784   0.18853   0.70100   0.00000  Uiso   1.00
C61    C     0.70583   0.22268   0.62332   0.00000  Uiso   1.00
C62    C     0.90109   0.16311   0.66962   0.00000  Uiso   1.00
H63    H     0.79705   0.13822   0.85273   0.00000  Uiso   1.00
H64    H     0.67229   0.20135   0.71858   0.00000  Uiso   1.00
Fe65   Fe    0.00175  -0.00018   0.00631   0.00000  Uiso   1.00
Fe66   Fe    0.50175   0.49982   0.00631   0.00000  Uiso   1.00
Fe67   Fe    0.00175   0.00018   0.50631   0.00000  Uiso   1.00
Fe68   Fe    0.50175   0.50018   0.50631   0.00000  Uiso   1.00
O69    O     0.00312   0.88206   0.75699   0.00000  Uiso   1.00
H70    H    -0.04019   0.81874   0.71817   0.00000  Uiso   1.00
O71    O     0.50312   0.38206   0.75699   0.00000  Uiso   1.00
H72    H     0.45981   0.31874   0.71817   0.00000  Uiso   1.00
O73    O     0.00312   0.11794   0.25699   0.00000  Uiso   1.00
H74    H    -0.04019   0.18126   0.21817   0.00000  Uiso   1.00
O75    O     0.50312   0.61794   0.25699   0.00000  Uiso   1.00
H76    H     0.45981   0.68126   0.21817   0.00000  Uiso   1.00
loop_
_geom_bond_atom_site_label_1
_geom_bond_atom_site_label_2
_geom_bond_distance
_geom_bond_site_symmetry_2
_ccdc_geom_bond_type
O1     C6      1.285   .     A
O1     Fe68    1.879   .     S
O2     C6      1.284   1_556 A
O2     Fe66    1.890   1_556 S
C3     C6      1.536   .     S
C3     C4      1.424   .     A
C3     C45     1.423   1_554 S
C4     C5      1.420   .     A
C4     H7      1.084   .     S
C5     H8      1.086   .     S
C5     C43     1.412   1_554 A
C6     O2      1.284   1_554 A
O9     C14     1.285   .     A
O9     Fe67    1.879   1_665 S
O10    C14     1.284   1_556 S
O10    Fe65    1.890   1_666 A
C11    C14     1.536   .     S
C11    C12     1.424   .     A
C11    C37     1.423   1_554 S
C12    C13     1.420   .     A
C12    H15     1.084   .     S
C13    H16     1.086   .     S
C13    C35     1.412   1_554 A
C14    O10     1.284   1_554 S
O17    C22     1.282   .     A
O17    Fe66    1.867   .     S
O18    C22     1.283   .     A
O18    Fe68    1.885   .     S
C19    C22     1.524   .     S
C19    C20     1.408   .     A
C19    C61     1.412   .     A
C20    C21     1.409   .     A
C20    H23     1.083   .     S
C21    Br24    1.902   .     S
C21    C59     1.423   .     A
O25    C30     1.282   .     A
O25    Fe65    1.867   1_565 S
O26    C30     1.283   .     A
O26    Fe67    1.885   1_565 S
C27    C30     1.524   .     S
C27    C28     1.408   .     A
C27    C53     1.412   .     A
C28    C29     1.409   .     A
C28    H31     1.083   .     S
C29    Br32    1.902   .     S
C29    C51     1.423   .     A
O33    C38     1.282   .     A
O33    Fe68    1.867   .     S
O34    Fe66    1.885   .     S
O34    C38     1.283   1_554 A
C35    C38     1.524   .     S
C35    C36     1.408   .     A
C35    C13     1.412   1_556 A
C36    C37     1.409   .     A
C36    H39     1.083   .     S
C37    Br40    1.902   .     S
C37    C11     1.423   1_556 S
C38    O34     1.283   1_556 A
O41    C46     1.282   .     A
O41    Fe67    1.867   .     S
O42    Fe65    1.885   .     S
O42    C46     1.283   1_554 S
C43    C46     1.524   .     S
C43    C44     1.408   .     A
C43    C5      1.412   1_556 A
C44    C45     1.409   .     A
C44    H47     1.083   .     S
C45    Br48    1.902   .     S
C45    C3      1.423   1_556 S
C46    O42     1.283   1_556 S
O49    C54     1.285   .     A
O49    Fe66    1.879   1_556 S
O50    C54     1.284   .     A
O50    Fe68    1.890   .     S
C51    C54     1.536   .     S
C51    C52     1.424   .     A
C52    C53     1.420   .     A
C52    H55     1.084   .     S
C53    H56     1.086   .     S
O57    C62     1.285   .     A
O57    Fe65    1.879   1_656 S
O58    C62     1.284   .     A
O58    Fe67    1.890   1_655 A
C59    C62     1.536   .     S
C59    C60     1.424   .     A
C60    C61     1.420   .     A
C60    H63     1.084   .     S
C61    H64     1.086   .     S
Fe65   O73     1.967   .     S
Fe65   O10     1.890   1_444 A
Fe65   O25     1.867   1_545 S
Fe65   O57     1.879   1_454 S
Fe65   O69     1.971   1_544 A
Fe66   O75     1.967   .     S
Fe66   O2      1.890   1_554 S
Fe66   O49     1.879   1_554 S
Fe66   O71     1.971   1_554 S
Fe67   O73     1.971   .     S
Fe67   O9      1.879   1_445 S
Fe67   O26     1.885   1_545 S
Fe67   O58     1.890   1_455 A
Fe67   O69     1.967   1_545 S
Fe68   O71     1.967   .     S
Fe68   O75     1.971   .     S
O69    H70     0.977   .     S
O69    Fe65    1.971   1_566 A
O69    Fe67    1.967   1_565 S
O71    H72     0.977   .     S
O71    Fe66    1.971   1_556 S
O73    H74     0.977   .     S
O75    H76     0.977   .     S

MIL-53(Fe)-CH3
data_MIL-53(Fe)dry-1CH3
_audit_creation_date              2009-10-30
_audit_creation_method            'Materials Studio'
_symmetry_space_group_name_H-M    'P1'
_symmetry_Int_Tables_number       1
_symmetry_cell_setting            triclinic
loop_
_symmetry_equiv_pos_as_xyz
  x,y,z
_cell_length_a                    20.0590
_cell_length_b                    7.9470
_cell_length_c                    6.8970
_cell_angle_alpha                 90.0000
_cell_angle_beta                  106.4300
_cell_angle_gamma                 90.0000
loop_
_atom_site_label
_atom_site_type_symbol
_atom_site_fract_x
_atom_site_fract_y
_atom_site_fract_z
_atom_site_U_iso_or_equiv
_atom_site_adp_type
_atom_site_occupancy
O1     O     0.41222   0.37588   0.35415   0.00000  Uiso   1.00
O2     O     0.43410   0.32680   1.05597   0.00000  Uiso   1.00
C3     C     0.31646   0.26929   0.07571   0.00000  Uiso   1.00
C4     C     0.27640   0.21793   0.20244   0.00000  Uiso   1.00
C5     C     0.20350   0.19499   0.13291   0.00000  Uiso   1.00
C6     C     0.39252   0.32832   0.16725   0.00000  Uiso   1.00
H7     H     0.30369   0.18272   0.35263   0.00000  Uiso   1.00
H8     H     0.17575   0.15554   0.23904   0.00000  Uiso   1.00
O9     O     0.91222   0.87588   0.35415   0.00000  Uiso   1.00
O10    O     0.93410   0.82680   1.05597   0.00000  Uiso   1.00
C11    C     0.81646   0.76929   0.07571   0.00000  Uiso   1.00
C12    C     0.77640   0.71793   0.20244   0.00000  Uiso   1.00
C13    C     0.70350   0.69499   0.13291   0.00000  Uiso   1.00
C14    C     0.89252   0.82832   0.16725   0.00000  Uiso   1.00
H15    H     0.80369   0.68272   0.35263   0.00000  Uiso   1.00
H16    H     0.67575   0.65554   0.23904   0.00000  Uiso   1.00
O17    O     0.57346   0.38525   0.15688   0.00000  Uiso   1.00
O18    O     0.55410   0.32933   0.45665   0.00000  Uiso   1.00
C19    C     0.66976   0.28127   0.42232   0.00000  Uiso   1.00
C20    C     0.71648   0.30146   0.30442   0.00000  Uiso   1.00
C21    C     0.78907   0.27546   0.38355   0.00000  Uiso   1.00
C22    C     0.59389   0.33415   0.34017   0.00000  Uiso   1.00
H23    H     0.69611   0.34094   0.14843   0.00000  Uiso   1.00
C24    C     0.83388   0.31007   0.24596   0.00000  Uiso   1.00
O25    O     0.07346   0.88525   0.15688   0.00000  Uiso   1.00
O26    O     0.05410   0.82933   0.45665   0.00000  Uiso   1.00
C27    C     0.16976   0.78127   0.42232   0.00000  Uiso   1.00
C28    C     0.21648   0.80146   0.30442   0.00000  Uiso   1.00
C29    C     0.28907   0.77546   0.38355   0.00000  Uiso   1.00
C30    C     0.09389   0.83415   0.34017   0.00000  Uiso   1.00
H31    H     0.19611   0.84094   0.14843   0.00000  Uiso   1.00
C32    C     0.33388   0.81007   0.24596   0.00000  Uiso   1.00
O33    O     0.57210   0.60846   0.65555   0.00000  Uiso   1.00
O34    O     0.55296   0.66049  -0.04141   0.00000  Uiso   1.00
C35    C     0.66757   0.70899   0.92585   0.00000  Uiso   1.00
C36    C     0.70749   0.74515   0.79494   0.00000  Uiso   1.00
C37    C     0.77982   0.77352   0.86536   0.00000  Uiso   1.00
C38    C     0.59243   0.65589   0.84148   0.00000  Uiso   1.00
H39    H     0.68205   0.74563   0.63368   0.00000  Uiso   1.00
C40    C     0.81495   0.78482   0.70495   0.00000  Uiso   1.00
O41    O     0.07210   0.10846   0.65555   0.00000  Uiso   1.00
O42    O     0.05296   0.16049  -0.04141   0.00000  Uiso   1.00
C43    C     0.16756   0.20899   0.92585   0.00000  Uiso   1.00
C44    C     0.20749   0.24515   0.79494   0.00000  Uiso   1.00
C45    C     0.27982   0.27352   0.86536   0.00000  Uiso   1.00
C46    C     0.09243   0.15589   0.84148   0.00000  Uiso   1.00
H47    H     0.18205   0.24563   0.63368   0.00000  Uiso   1.00
C48    C     0.31494   0.28482   0.70495   0.00000  Uiso   1.00
O49    O     0.41373   0.61091   0.85698   0.00000  Uiso   1.00
O50    O     0.43313   0.65787   0.55582   0.00000  Uiso   1.00
C51    C     0.31780   0.71872   0.58684   0.00000  Uiso   1.00
C52    C     0.27024   0.69681   0.70310   0.00000  Uiso   1.00
C53    C     0.19837   0.72928   0.62415   0.00000  Uiso   1.00
C54    C     0.39361   0.66129   0.67255   0.00000  Uiso   1.00
H55    H     0.28865   0.64904   0.85585   0.00000  Uiso   1.00
H56    H     0.16473   0.71339   0.72145   0.00000  Uiso   1.00
O57    O     0.91373   0.11091   0.85698   0.00000  Uiso   1.00
O58    O     0.93313   0.15787   0.55582   0.00000  Uiso   1.00
C59    C     0.81780   0.21872   0.58684   0.00000  Uiso   1.00
C60    C     0.77024   0.19681   0.70310   0.00000  Uiso   1.00
C61    C     0.69837   0.22928   0.62415   0.00000  Uiso   1.00
C62    C     0.89361   0.16129   0.67255   0.00000  Uiso   1.00
H63    H     0.78865   0.14904   0.85585   0.00000  Uiso   1.00
H64    H     0.66473   0.21339   0.72145   0.00000  Uiso   1.00
Fe65   Fe   -0.00665  -0.00476   0.00685   0.00000  Uiso   1.00
Fe66   Fe    0.49335   0.49524   0.00685   0.00000  Uiso   1.00
Fe67   Fe   -0.00705  -0.00710   0.50562   0.00000  Uiso   1.00
Fe68   Fe    0.49295   0.49290   0.50562   0.00000  Uiso   1.00
O69    O    -0.00355   0.87585   0.75861   0.00000  Uiso   1.00
H70    H    -0.04074   0.79226   0.72531   0.00000  Uiso   1.00
O71    O     0.49645   0.37585   0.75861   0.00000  Uiso   1.00
H72    H     0.45926   0.29226   0.72531   0.00000  Uiso   1.00
O73    O    -0.00895   0.11314   0.25505   0.00000  Uiso   1.00
H74    H     0.03529   0.17458   0.29275   0.00000  Uiso   1.00
O75    O     0.49105   0.61314   0.25505   0.00000  Uiso   1.00
H76    H     0.53529   0.67458   0.29275   0.00000  Uiso   1.00
H77    H     0.80474   0.37294   0.10353   0.00000  Uiso   1.00
H78    H     0.85532   0.19043   0.20636   0.00000  Uiso   1.00
H79    H     0.87790   0.39370   0.32170   0.00000  Uiso   1.00
H80    H     0.30474   0.87294   0.10353   0.00000  Uiso   1.00
H81    H     0.35532   0.69043   0.20636   0.00000  Uiso   1.00
H82    H     0.37790   0.89370   0.32170   0.00000  Uiso   1.00
H83    H     0.77999   0.84527   0.56898   0.00000  Uiso   1.00
H84    H     0.83272   0.65701   0.67790   0.00000  Uiso   1.00
H85    H     0.85884   0.86702   0.74620   0.00000  Uiso   1.00
H86    H     0.27999   0.34527   0.56898   0.00000  Uiso   1.00
H87    H     0.33272   0.15702   0.67790   0.00000  Uiso   1.00
H88    H     0.35884   0.36703   0.74620   0.00000  Uiso   1.00
loop_
_geom_bond_atom_site_label_1
_geom_bond_atom_site_label_2
_geom_bond_distance
_geom_bond_site_symmetry_2
_ccdc_geom_bond_type
O1     C6      1.293   .     A
O1     Fe68    1.903   .     S
O2     C6      1.283   1_556 A
O2     Fe66    1.883   1_556 S
C3     C6      1.550   .     S
C3     C4      1.405   .     A
C3     C45     1.429   1_554 S
C4     C5      1.416   .     A
C4     H7      1.063   .     S
C5     H8      1.084   .     S
C5     C43     1.410   1_554 A
C6     O2      1.283   1_554 A
O9     C14     1.293   .     A
O9     Fe67    1.903   1_665 S
O10    C14     1.283   1_556 S
O10    Fe65    1.883   1_666 A
C11    C14     1.550   .     S
C11    C12     1.405   .     A
C11    C37     1.429   1_554 S
C12    C13     1.416   .     A
C12    H15     1.063   .     S
C13    H16     1.084   .     S
C13    C35     1.410   1_554 A
C14    O10     1.283   1_554 S
O17    C22     1.280   .     A
O17    Fe66    1.864   .     S
O18    C22     1.283   .     A
O18    Fe68    1.882   .     S
C19    C22     1.525   .     S
C19    C20     1.413   .     A
C19    C61     1.409   .     A
C20    C21     1.418   .     A
C20    H23     1.084   .     S
C21    C24     1.506   .     S
C21    C59     1.430   .     A
C24    H77     1.110   .     S
C24    H78     1.109   .     S
C24    H79     1.111   .     S
O25    C30     1.280   .     A
O25    Fe65    1.864   1_565 S
O26    C30     1.283   .     A
O26    Fe67    1.882   1_565 S
C27    C30     1.525   .     S
C27    C28     1.413   .     A
C27    C53     1.409   .     A
C28    C29     1.418   .     A
C28    H31     1.084   .     S
C29    C32     1.506   .     S
C29    C51     1.430   .     A
C32    H80     1.110   .     S
C32    H81     1.109   .     S
C32    H82     1.111   .     S
O33    C38     1.287   .     A
O33    Fe68    1.872   .     S
O34    Fe66    1.868   .     S
O34    C38     1.282   1_554 A
C35    C38     1.514   .     S
C35    C36     1.396   .     A
C35    C13     1.410   1_556 A
C36    C37     1.412   .     A
C36    H39     1.085   .     S
C37    C40     1.473   .     S
C37    C11     1.429   1_556 S
C38    O34     1.282   1_556 A
C40    H83     1.109   .     S
C40    H84     1.110   .     S
C40    H85     1.068   .     S
O41    C46     1.287   .     A
O41    Fe67    1.872   .     S
O42    Fe65    1.868   .     S
O42    C46     1.282   1_554 S
C43    C46     1.514   .     S
C43    C44     1.396   .     A
C43    C5      1.410   1_556 A
C44    C45     1.412   .     A
C44    H47     1.085   .     S
C45    C48     1.473   .     S
C45    C3      1.429   1_556 S
C46    O42     1.282   1_556 S
C48    H86     1.109   .     S
C48    H87     1.110   .     S
C48    H88     1.068   .     S
O49    C54     1.285   .     A
O49    Fe66    1.879   1_556 S
O50    C54     1.280   .     A
O50    Fe68    1.874   .     S
C51    C54     1.537   .     S
C51    C52     1.420   .     A
C52    C53     1.413   .     A
C52    H55     1.082   .     S
C53    H56     1.085   .     S
O57    C62     1.285   .     A
O57    Fe65    1.879   1_656 S
O58    C62     1.280   .     A
O58    Fe67    1.874   1_655 A
C59    C62     1.537   .     S
C59    C60     1.420   .     A
C60    C61     1.413   .     A
C60    H63     1.082   .     S
C61    H64     1.085   .     S
Fe65   O73     1.963   .     S
Fe65   O10     1.883   1_444 A
Fe65   O25     1.864   1_545 S
Fe65   O57     1.879   1_454 S
Fe65   O69     1.974   1_544 A
Fe66   O75     1.963   .     S
Fe66   O2      1.883   1_554 S
Fe66   O49     1.879   1_554 S
Fe66   O71     1.974   1_554 A
Fe67   O73     1.966   .     S
Fe67   O9      1.903   1_445 S
Fe67   O26     1.882   1_545 S
Fe67   O58     1.874   1_455 A
Fe67   O69     1.961   1_545 S
Fe68   O71     1.961   .     S
Fe68   O75     1.966   .     S
O69    H70     0.977   .     S
O69    Fe65    1.974   1_566 A
O69    Fe67    1.961   1_565 S
O71    H72     0.977   .     S
O71    Fe66    1.974   1_556 A
O73    H74     0.981   .     S
O75    H76     0.981   .     S

MIL-53(Fe)-(OH)2
data_MIL53(Fe)dry-2OH
_audit_creation_date              2009-10-30
_audit_creation_method            'Materials Studio'
_symmetry_space_group_name_H-M    'P1'
_symmetry_Int_Tables_number       1
_symmetry_cell_setting            triclinic
loop_
_symmetry_equiv_pos_as_xyz
  x,y,z
_cell_length_a                    21.3000
_cell_length_b                    6.8800
_cell_length_c                    6.8800
_cell_angle_alpha                 90.0000
_cell_angle_beta                  114.6000
_cell_angle_gamma                 90.0000
loop_
_atom_site_label
_atom_site_type_symbol
_atom_site_fract_x
_atom_site_fract_y
_atom_site_fract_z
_atom_site_U_iso_or_equiv
_atom_site_adp_type
_atom_site_occupancy
O1     O     0.08083   0.12592   0.01802   0.00000  Uiso   1.00
O2     O     0.05848   0.19397   0.67505   0.00000  Uiso   1.00
C3     C     0.10054   0.18066   0.87304   0.00000  Uiso   1.00
C4     C     0.22097   0.70919   0.64594   0.00000  Uiso   1.00
C5     C     0.29289   0.69518   0.70708   0.00000  Uiso   1.00
C6     C     0.17624   0.76917   0.43676   0.00000  Uiso   1.00
O7     O     0.19644   0.65229   0.79656   0.00000  Uiso   1.00
H8     H     0.32401   0.64927   0.86891   0.00000  Uiso   1.00
H9     H     0.35448   0.87774   0.26333   0.00000  Uiso   1.00
O10    O     0.58083   0.62592   0.01802   0.00000  Uiso   1.00
O11    O     0.55848   0.69397   0.67505   0.00000  Uiso   1.00
C12    C     0.60054   0.68066   0.87304   0.00000  Uiso   1.00
C13    C     0.72097   0.20919   0.64594   0.00000  Uiso   1.00
C14    C     0.79289   0.19518   0.70708   0.00000  Uiso   1.00
C15    C     0.67624   0.26917   0.43676   0.00000  Uiso   1.00
O16    O     0.69644   0.15229   0.79656   0.00000  Uiso   1.00
H17    H     0.82401   0.14927   0.86891   0.00000  Uiso   1.00
H18    H     0.85448   0.37774   0.26333   0.00000  Uiso   1.00
O19    O     0.91917   0.12592   0.48198   0.00000  Uiso   1.00
O20    O     0.94152   0.19397   0.82495   0.00000  Uiso   1.00
C21    C     0.89946   0.18066   0.62696   0.00000  Uiso   1.00
C22    C     0.77903   0.70919   0.85406   0.00000  Uiso   1.00
C23    C     0.70711   0.69518   0.79292   0.00000  Uiso   1.00
C24    C     0.82376   0.76917   0.06324   0.00000  Uiso   1.00
O25    O     0.80356   0.65229   0.70344   0.00000  Uiso   1.00
H26    H     0.67599   0.64927   0.63109   0.00000  Uiso   1.00
H27    H     0.64552   0.87774   0.23667   0.00000  Uiso   1.00
O28    O     0.41917   0.62592   0.48198   0.00000  Uiso   1.00
O29    O     0.44152   0.69397   0.82495   0.00000  Uiso   1.00
C30    C     0.39946   0.68066   0.62696   0.00000  Uiso   1.00
C31    C     0.27903   0.20919   0.85406   0.00000  Uiso   1.00
C32    C     0.20711   0.19518   0.79292   0.00000  Uiso   1.00
C33    C     0.32376   0.26917   0.06324   0.00000  Uiso   1.00
O34    O     0.30356   0.15229   0.70344   0.00000  Uiso   1.00
H35    H     0.17599   0.14927   0.63109   0.00000  Uiso   1.00
H36    H     0.14552   0.37774   0.23667   0.00000  Uiso   1.00
O37    O     0.91917   0.87408   0.98198   0.00000  Uiso   1.00
O38    O     0.94152   0.80603   0.32495   0.00000  Uiso   1.00
C39    C     0.89946   0.81934   0.12696   0.00000  Uiso   1.00
C40    C     0.77903   0.29081   0.35406   0.00000  Uiso   1.00
C41    C     0.70711   0.30482   0.29292   0.00000  Uiso   1.00
C42    C     0.82376   0.23083   0.56324   0.00000  Uiso   1.00
O43    O     0.80356   0.34771   0.20344   0.00000  Uiso   1.00
H44    H     0.67599   0.35073   0.13109   0.00000  Uiso   1.00
H45    H     0.64552   0.12226   0.73667   0.00000  Uiso   1.00
O46    O     0.41917   0.37408   0.98198   0.00000  Uiso   1.00
O47    O     0.44152   0.30603   0.32495   0.00000  Uiso   1.00
C48    C     0.39946   0.31934   0.12696   0.00000  Uiso   1.00
C49    C     0.27903   0.79081   0.35406   0.00000  Uiso   1.00
C50    C     0.20711   0.80482   0.29292   0.00000  Uiso   1.00
C51    C     0.32376   0.73083   0.56324   0.00000  Uiso   1.00
O52    O     0.30356   0.84771   0.20344   0.00000  Uiso   1.00
H53    H     0.17599   0.85073   0.13109   0.00000  Uiso   1.00
H54    H     0.14552   0.62226   0.73667   0.00000  Uiso   1.00
O55    O     0.08083   0.87408   0.51802   0.00000  Uiso   1.00
O56    O     0.05848   0.80603   0.17505   0.00000  Uiso   1.00
C57    C     0.10054   0.81934   0.37304   0.00000  Uiso   1.00
C58    C     0.22097   0.29081   0.14594   0.00000  Uiso   1.00
C59    C     0.29289   0.30482   0.20708   0.00000  Uiso   1.00
C60    C     0.17624   0.23083   0.93676   0.00000  Uiso   1.00
O61    O     0.19644   0.34771   0.29656   0.00000  Uiso   1.00
H62    H     0.32401   0.35073   0.36891   0.00000  Uiso   1.00
H63    H     0.35448   0.12226   0.76333   0.00000  Uiso   1.00
O64    O     0.58083   0.37408   0.51802   0.00000  Uiso   1.00
O65    O     0.55848   0.30603   0.17505   0.00000  Uiso   1.00
C66    C     0.60054   0.31934   0.37304   0.00000  Uiso   1.00
C67    C     0.72097   0.79081   0.14594   0.00000  Uiso   1.00
C68    C     0.79289   0.80482   0.20708   0.00000  Uiso   1.00
C69    C     0.67624   0.73083   0.93676   0.00000  Uiso   1.00
O70    O     0.69644   0.84771   0.29656   0.00000  Uiso   1.00
H71    H     0.82401   0.85073   0.36891   0.00000  Uiso   1.00
H72    H     0.85448   0.62226   0.76333   0.00000  Uiso   1.00
Fe73   Fe    0.00000   0.00000   0.00000   0.00000  Uiso   1.00
Fe74   Fe    0.50000   0.50000   0.00000   0.00000  Uiso   1.00
Fe75   Fe    0.00000   0.00000   0.50000   0.00000  Uiso   1.00
Fe76   Fe    0.50000   0.50000   0.50000   0.00000  Uiso   1.00
O77    O     0.00000   0.86763   0.75000   0.00000  Uiso   1.00
H78    H     0.00000   0.72526   0.75000   0.00000  Uiso   1.00
O79    O     0.50000   0.36763   0.75000   0.00000  Uiso   1.00
H80    H     0.50000   0.22526   0.75000   0.00000  Uiso   1.00
O81    O     0.00000   0.13237   0.25000   0.00000  Uiso   1.00
H82    H     0.00000   0.27474   0.25000   0.00000  Uiso   1.00
O83    O     0.50000   0.63237   0.25000   0.00000  Uiso   1.00
H84    H     0.50000   0.77474   0.25000   0.00000  Uiso   1.00
loop_
_geom_bond_atom_site_label_1
_geom_bond_atom_site_label_2
_geom_bond_distance
_geom_bond_site_symmetry_2
_ccdc_geom_bond_type
O1     C3      1.289   1_554 A
O1     Fe73    1.885   .     S
O2     C3      1.285   .     A
O2     Fe75    1.880   .     S
C3     O1      1.289   1_556 A
C3     C60     1.524   .     S
C4     C5      1.413   .     A
C4     C6      1.417   .     A
C4     O7      1.397   .     S
C5     H8      1.079   .     S
C5     C51     1.419   .     A
C6     C57     1.524   .     S
C6     C50     1.419   .     A
O7     H54     1.008   .     S
H9     O52     1.008   .     S
O10    C12     1.289   1_554 A
O10    Fe74    1.885   .     S
O11    C12     1.285   .     A
O11    Fe76    1.880   .     S
C12    O10     1.289   1_556 A
C12    C69     1.524   .     S
C13    C14     1.413   .     A
C13    C15     1.417   .     A
C13    O16     1.397   .     S
C14    H17     1.079   .     S
C14    C42     1.419   .     A
C15    C66     1.524   .     S
C15    C41     1.419   .     A
O16    H45     1.008   .     S
H18    O43     1.008   .     S
O19    C21     1.289   .     A
O19    Fe75    1.885   1_655 S
O20    C21     1.285   .     A
O20    Fe73    1.880   1_656 S
C21    C42     1.524   .     S
C22    C23     1.413   .     A
C22    C24     1.417   1_556 A
C22    O25     1.397   .     S
C23    H26     1.079   .     S
C23    C69     1.419   .     A
C24    C22     1.417   1_554 A
C24    C39     1.524   .     S
C24    C68     1.419   .     A
O25    H72     1.008   .     S
H27    O70     1.008   .     S
O28    C30     1.289   .     A
O28    Fe76    1.885   .     S
O29    C30     1.285   .     A
O29    Fe74    1.880   1_556 S
C30    C51     1.524   .     S
C31    C32     1.413   .     A
C31    C33     1.417   1_556 A
C31    O34     1.397   .     S
C32    H35     1.079   .     S
C32    C60     1.419   .     A
C33    C31     1.417   1_554 A
C33    C48     1.524   .     S
C33    C59     1.419   .     A
O34    H63     1.008   .     S
H36    O61     1.008   .     S
O37    C39     1.289   1_556 A
O37    Fe73    1.885   1_666 S
O38    C39     1.285   .     A
O38    Fe75    1.880   1_665 S
C39    O37     1.289   1_554 A
C40    C41     1.413   .     A
C40    C42     1.417   .     A
C40    O43     1.397   .     S
C41    H44     1.079   .     S
O46    C48     1.289   1_556 A
O46    Fe74    1.885   1_556 S
O47    C48     1.285   .     A
O47    Fe76    1.880   .     S
C48    O46     1.289   1_554 A
C49    C50     1.413   .     A
C49    C51     1.417   .     A
C49    O52     1.397   .     S
C50    H53     1.079   .     S
O55    C57     1.289   .     A
O55    Fe75    1.885   1_565 S
O56    C57     1.285   .     A
O56    Fe73    1.880   1_565 S
C58    C59     1.413   .     A
C58    C60     1.417   1_554 A
C58    O61     1.397   .     S
C59    H62     1.079   .     S
C60    C58     1.417   1_556 A
O64    C66     1.289   .     A
O64    Fe76    1.885   .     S
O65    C66     1.285   .     A
O65    Fe74    1.880   .     S
C67    C68     1.413   .     A
C67    C69     1.417   1_554 A
C67    O70     1.397   .     S
C68    H71     1.079   .     S
C69    C67     1.417   1_556 A
Fe73   O37     1.885   1_444 S
Fe73   O20     1.880   1_454 S
Fe73   O56     1.880   1_545 S
Fe73   O77     1.946   1_544 S
Fe73   O81     1.946   .     S
Fe74   O46     1.885   1_554 S
Fe74   O29     1.880   1_554 S
Fe74   O79     1.946   1_554 S
Fe74   O83     1.946   .     S
Fe75   O19     1.885   1_455 S
Fe75   O55     1.885   1_545 S
Fe75   O38     1.880   1_445 S
Fe75   O77     1.946   1_545 S
Fe75   O81     1.946   .     S
Fe76   O79     1.946   .     S
Fe76   O83     1.946   .     S
O77    H78     0.980   .     S
O77    Fe73    1.946   1_566 S
O77    Fe75    1.946   1_565 S
O79    H80     0.980   .     S
O79    Fe74    1.946   1_556 S
O81    H82     0.980   .     S
O83    H84     0.980   .     S

MIL-53(Fe)-(CF3)2
data_MIL53(Fe)dry-2CF3
_audit_creation_date              2009-10-30
_audit_creation_method            'Materials Studio'
_symmetry_space_group_name_H-M    'P1'
_symmetry_Int_Tables_number       1
_symmetry_cell_setting            triclinic
loop_
_symmetry_equiv_pos_as_xyz
  x,y,z
_cell_length_a                    19.4291
_cell_length_b                    10.3551
_cell_length_c                    6.9110
_cell_angle_alpha                 90.0000
_cell_angle_beta                  108.5710
_cell_angle_gamma                 90.0000
loop_
_atom_site_label
_atom_site_type_symbol
_atom_site_fract_x
_atom_site_fract_y
_atom_site_fract_z
_atom_site_U_iso_or_equiv
_atom_site_adp_type
_atom_site_occupancy
O1     O     0.69332   0.38753   0.61264   0.00000  Uiso   1.00
C2     C     0.56742   0.52362   0.63645   0.00000  Uiso   1.00
H3     H     0.61950   0.54445   0.74910   0.00000  Uiso   1.00
O4     O     0.19272   0.88683   0.10699   0.00000  Uiso   1.00
C5     C     0.06734   1.02150   0.13412   0.00000  Uiso   1.00
H6     H     0.11965   1.04127   0.24636   0.00000  Uiso   1.00
O7     O     0.80617   0.38662   0.39137   0.00000  Uiso   1.00
C8     C     0.93068   0.52471   0.36928   0.00000  Uiso   1.00
H9     H     0.87813   0.54920   0.26271   0.00000  Uiso   1.00
O10    O     0.30558   0.88713   0.88571   0.00000  Uiso   1.00
C11    C     0.43058   1.02642   0.86663   0.00000  Uiso   1.00
H12    H     0.37825   1.05143   0.75930   0.00000  Uiso   1.00
O13    O     0.15702   0.66381   0.27516   0.00000  Uiso   1.00
C14    C    -0.00551   0.57298   0.32078   0.00000  Uiso   1.00
C15    C    -0.01707   0.65060   0.12714   0.00000  Uiso   1.00
H16    H     0.70172   0.11754   0.46478   0.00000  Uiso   1.00
O17    O     0.65776   0.16427   0.77931   0.00000  Uiso   1.00
C18    C     0.49490   0.07402   0.82016   0.00000  Uiso   1.00
C19    C     0.48456   0.15261   0.62814   0.00000  Uiso   1.00
O20    O     0.34020   0.66428   0.71681   0.00000  Uiso   1.00
C21    C     0.50268   0.57303   0.67925   0.00000  Uiso   1.00
C22    C     0.51138   0.65348   0.86875   0.00000  Uiso   1.00
O23    O     0.84099   0.16400   0.22103   0.00000  Uiso   1.00
C24    C     1.00314   0.07185   0.17885   0.00000  Uiso   1.00
C25    C     1.01329   0.15116   0.37035   0.00000  Uiso   1.00
H26    H     0.29701   0.61824   1.03218   0.00000  Uiso   1.00
O27    O     0.30556   0.61357   0.38545   0.00000  Uiso   1.00
C28    C     0.43112   0.47521   0.36660   0.00000  Uiso   1.00
H29    H     0.37899   0.45062   0.25793   0.00000  Uiso   1.00
O30    O     0.80529   0.11354   0.88986   0.00000  Uiso   1.00
C31    C     0.93052  -0.02142   0.86326   0.00000  Uiso   1.00
H32    H     0.87818  -0.04119   0.75116   0.00000  Uiso   1.00
O33    O     0.19272   0.61392   0.60676   0.00000  Uiso   1.00
C34    C     0.06792   0.47830   0.63415   0.00000  Uiso   1.00
H35    H     0.12042   0.45787   0.74500   0.00000  Uiso   1.00
O36    O     0.69246   0.11410   0.11113   0.00000  Uiso   1.00
C37    C     0.56729  -0.02499   0.13074   0.00000  Uiso   1.00
H38    H     0.61956  -0.05020   0.23819   0.00000  Uiso   1.00
O39    O     0.84105   0.33658   0.72315   0.00000  Uiso   1.00
C40    C     1.00400   0.42823   0.68070   0.00000  Uiso   1.00
C41    C     1.01500   0.34883   0.87238   0.00000  Uiso   1.00
H42    H     0.29715   0.88230   0.53239   0.00000  Uiso   1.00
O43    O     0.34031   0.83635   0.21703   0.00000  Uiso   1.00
C44    C     0.50289   0.92735   0.17704   0.00000  Uiso   1.00
C45    C     0.51276   0.84882   0.36899   0.00000  Uiso   1.00
O46    O     0.65785   0.33699   0.28140   0.00000  Uiso   1.00
C47    C     0.49575   0.42731   0.32207   0.00000  Uiso   1.00
C48    C     0.48628   0.34776   0.13126   0.00000  Uiso   1.00
O49    O     0.15707   0.83701   0.77534   0.00000  Uiso   1.00
C50    C    -0.00533   0.92815   0.81857   0.00000  Uiso   1.00
C51    C    -0.01577   0.84802   0.62790   0.00000  Uiso   1.00
H52    H     0.79692   0.38362   0.03747   0.00000  Uiso   1.00
Fe53   Fe    0.24878   0.74997   0.24549   0.00000  Uiso   1.00
Fe54   Fe    0.24878   0.75076   0.74549   0.00000  Uiso   1.00
Fe55   Fe    0.74936   0.25049   0.75122   0.00000  Uiso   1.00
Fe56   Fe    0.74937   0.25041   0.25123   0.00000  Uiso   1.00
O57    O     0.24881   0.65922  -0.00570   0.00000  Uiso   1.00
O58    O     0.74970   0.15930   0.50252   0.00000  Uiso   1.00
O59    O     0.74901   0.34158  -0.00008   0.00000  Uiso   1.00
O60    O     0.24888   0.84152   0.49440   0.00000  Uiso   1.00
C61    C     0.56783   0.44953   0.45754   0.00000  Uiso   1.00
C62    C     0.64289   0.38594   0.44268   0.00000  Uiso   1.00
C63    C     0.06710   0.94819  -0.04602   0.00000  Uiso   1.00
C64    C     0.14206   0.88453  -0.06251   0.00000  Uiso   1.00
C65    C     0.93135   0.44929   0.54731   0.00000  Uiso   1.00
C66    C     0.85641   0.38470   0.56202   0.00000  Uiso   1.00
C67    C     0.43061   0.95043   0.04355   0.00000  Uiso   1.00
C68    C     0.35561   0.88585   0.05673   0.00000  Uiso   1.00
C69    C     0.06721   0.55218   0.45416   0.00000  Uiso   1.00
C70    C     0.14206   0.61606   0.43722   0.00000  Uiso   1.00
C71    C     0.56730   0.05121  -0.04626   0.00000  Uiso   1.00
C72    C     0.64235   0.11591  -0.05980   0.00000  Uiso   1.00
C73    C     0.43068   0.55068   0.54365   0.00000  Uiso   1.00
C74    C     0.35556   0.61496   0.55646   0.00000  Uiso   1.00
C75    C     0.93079   0.05179   0.04328   0.00000  Uiso   1.00
C76    C     0.85587   0.11533   0.05945   0.00000  Uiso   1.00
F77    F    -0.00077   0.77812   0.17323   0.00000  Uiso   1.00
F78    F    -0.08822   0.64402  -0.00248   0.00000  Uiso   1.00
F79    F     0.02924   0.60964   0.02500   0.00000  Uiso   1.00
F80    F     0.50197   0.27932   0.67720   0.00000  Uiso   1.00
F81    F     0.41359   0.14875   0.49708   0.00000  Uiso   1.00
F82    F     0.53103   0.11109   0.52635   0.00000  Uiso   1.00
F83    F     0.46686   0.60835   0.97429   0.00000  Uiso   1.00
F84    F     0.48923   0.77796   0.81526   0.00000  Uiso   1.00
F85    F     0.58253   0.65776   0.99770   0.00000  Uiso   1.00
F86    F     0.96866   0.10712   0.47571   0.00000  Uiso   1.00
F87    F     0.99298   0.27689   0.32054   0.00000  Uiso   1.00
F88    F     1.08470   0.15154   0.49829   0.00000  Uiso   1.00
F89    F     0.99848   0.22186   0.82272   0.00000  Uiso   1.00
F90    F     0.96834   0.38846   0.97468   0.00000  Uiso   1.00
F91    F     1.08592   0.35380   1.00320   0.00000  Uiso   1.00
F92    F     0.49319   0.72269   0.32026   0.00000  Uiso   1.00
F93    F     0.46739   0.89284   0.47243   0.00000  Uiso   1.00
F94    F     0.58397   0.85000   0.49852   0.00000  Uiso   1.00
F95    F     0.41478   0.34502   0.00369   0.00000  Uiso   1.00
F96    F     0.50788   0.22275   0.18230   0.00000  Uiso   1.00
F97    F     0.53035   0.39317   0.02507   0.00000  Uiso   1.00
F98    F    -0.08705   0.84874   0.49910   0.00000  Uiso   1.00
F99    F     0.00334   0.72224   0.67980   0.00000  Uiso   1.00
F100   F     0.02955   0.88989   0.52305   0.00000  Uiso   1.00
loop_
_geom_bond_atom_site_label_1
_geom_bond_atom_site_label_2
_geom_bond_distance
_geom_bond_site_symmetry_2
_ccdc_geom_bond_type
O1     C62     1.268   .     D
O1     Fe55    1.858   .     S
C2     H3      1.084   .     S
C2     C61     1.457   .     D
C2     C21     1.473   .     S
O4     Fe53    1.857   .     S
O4     C64     1.268   .     D
C5     H6      1.084   .     S
C5     C63     1.457   .     D
C5     C24     1.473   1_465 D
O7     Fe56    1.861   .     S
O7     C66     1.269   .     D
C8     H9      1.082   .     S
C8     C65     1.454   .     D
C8     C14     1.471   1_655 S
O10    Fe54    1.863   .     S
O10    C68     1.269   1_556 S
C11    H12     1.082   .     S
C11    C18     1.471   1_565 D
C11    C67     1.454   1_556 S
O13    Fe53    2.061   .     S
O13    C70     1.338   .     S
C14    C15     1.515   .     S
C14    C69     1.436   .     D
C14    C8      1.471   1_455 S
C15    F77     1.372   .     S
C15    F78     1.389   .     S
C15    F79     1.376   .     S
H16    O58     0.984   .     S
O17    Fe55    2.055   .     S
O17    C72     1.337   1_556 D
C18    C19     1.515   .     S
C18    C11     1.471   1_545 D
C18    C71     1.435   1_556 D
C19    F80     1.370   .     S
C19    F81     1.388   .     S
C19    F82     1.378   .     S
O20    Fe54    2.054   .     S
O20    C74     1.337   .     S
C21    C22     1.515   .     S
C21    C73     1.433   .     D
C22    F83     1.379   .     S
C22    F85     1.387   .     S
C22    F84     1.372   .     S
O23    C76     1.338   .     S
O23    Fe56    2.061   .     S
C24    C25     1.516   .     S
C24    C75     1.435   .     D
C24    C5      1.473   1_645 D
C25    F86     1.376   .     S
C25    F87     1.372   .     S
C25    F88     1.388   .     S
H26    O57     0.985   1_556 D
O27    Fe53    1.862   .     S
O27    C74     1.269   .     D
C28    H29     1.082   .     S
C28    C47     1.471   .     D
C28    C73     1.454   .     S
O30    Fe55    1.857   .     S
O30    C76     1.267   1_556 S
C31    H32     1.084   .     S
C31    C50     1.472   1_645 D
C31    C75     1.455   1_556 S
O33    Fe54    1.857   .     S
O33    C70     1.268   .     D
C34    H35     1.084   .     S
C34    C69     1.457   .     S
C34    C40     1.473   1_455 S
O36    C72     1.269   .     D
O36    Fe56    1.863   .     S
C37    H38     1.082   .     S
C37    C71     1.456   .     D
C37    C44     1.472   1_545 S
O39    Fe55    2.056   .     S
O39    C66     1.338   .     S
C40    C41     1.515   .     S
C40    C65     1.436   .     S
C40    C34     1.473   1_655 S
C41    F89     1.371   .     S
C41    F90     1.378   .     S
C41    F91     1.388   .     S
H42    O60     0.985   .     S
O43    Fe53    2.055   .     S
O43    C68     1.337   .     S
C44    C45     1.515   .     S
C44    C67     1.434   .     D
C44    C37     1.472   1_565 S
C45    F92     1.372   .     S
C45    F93     1.377   .     S
C45    F94     1.388   .     S
O46    Fe56    2.060   .     S
O46    C62     1.338   .     S
C47    C48     1.516   .     S
C47    C61     1.434   .     S
C48    F95     1.388   .     S
C48    F96     1.372   .     S
C48    F97     1.376   .     S
O49    Fe54    2.061   .     S
O49    C64     1.338   1_556 D
C50    C51     1.515   .     S
C50    C31     1.472   1_465 D
C50    C63     1.435   1_556 S
C51    F98     1.387   .     S
C51    F99     1.370   .     S
C51    F100    1.377   .     S
H52    O59     0.985   .     S
Fe53   O57     1.974   .     S
Fe53   O60     1.964   .     S
Fe54   O60     1.974   .     S
Fe54   O57     1.963   1_556 S
Fe55   O58     1.963   .     S
Fe55   O59     1.962   1_556 S
Fe56   O59     1.975   .     S
Fe56   O58     1.975   .     S
O57    H26     0.985   1_554 D
O57    Fe54    1.963   1_554 S
O59    Fe55    1.962   1_554 S
C61    C62     1.633   .     S
C63    C64     1.635   .     S
C63    C50     1.435   1_554 S
C64    O49     1.338   1_554 D
C65    C66     1.635   .     S
C67    C68     1.632   .     S
C67    C11     1.454   1_554 S
C68    O10     1.269   1_554 S
C69    C70     1.635   .     S
C71    C72     1.634   .     S
C71    C18     1.435   1_554 D
C72    O17     1.337   1_554 D
C73    C74     1.632   .     S
C75    C76     1.633   .     S
C75    C31     1.455   1_554 S
C76    O30     1.267   1_554 S
